# Supplementary material for: Human Placental Lactogen in Relation to Maternal Metabolic Health and Fetal Outcomes: A Systematic Review and Meta-Analysis
Source: MDPI journal article supplement (doi:10.3390/ijms232415621), 2022-12-09

Supplementary material 2: Funnel plots

Funnel plot for meta-analysis of hPL levels in T1DM vs non-diabetic control women in late pregnancy (>24 weeks) – 4 studies

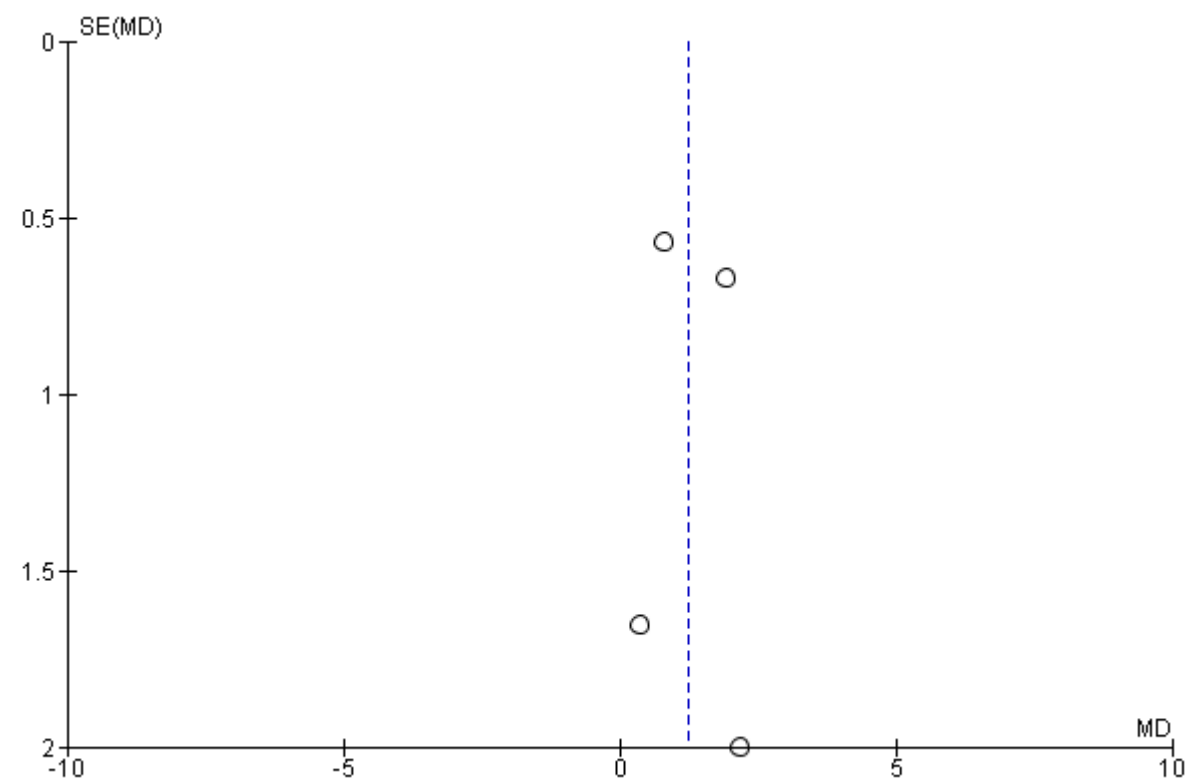

Funnel plot for meta-analysis of hPL levels in GDM vs non-diabetic control women in early pregnancy (≤24 weeks) – 3 studies

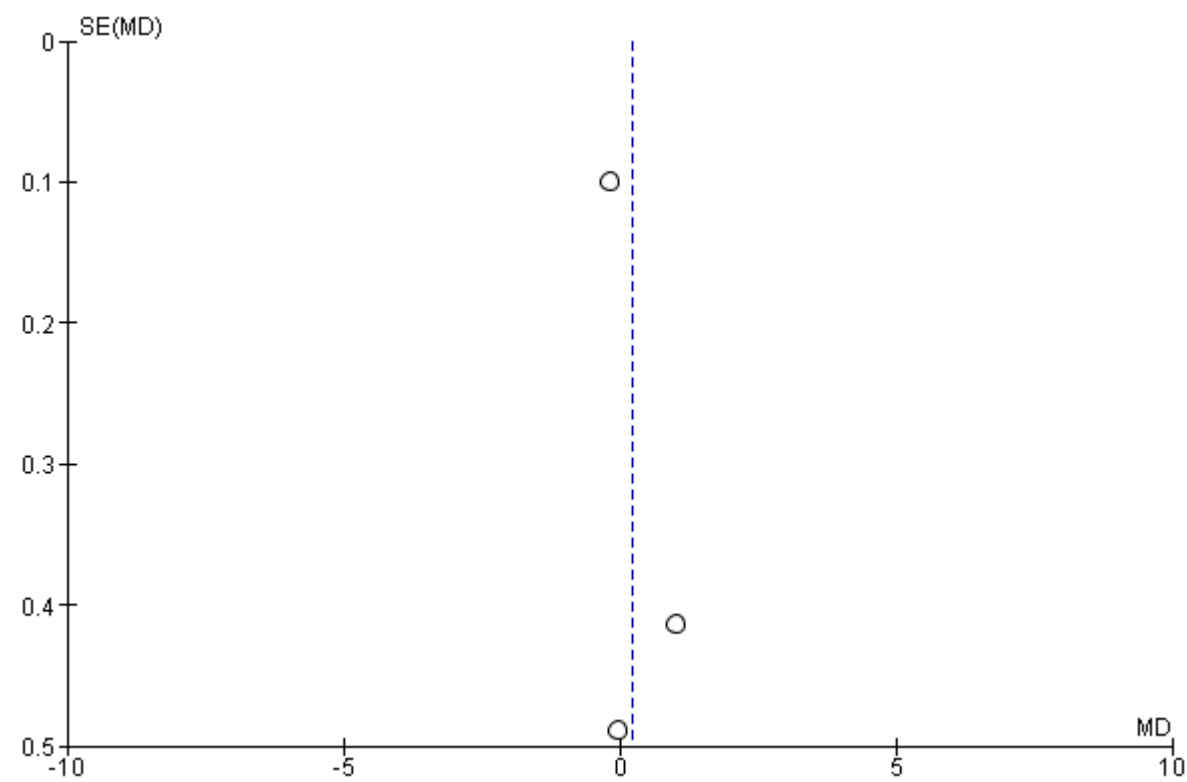

*Funnel plot for meta-analysis of hPL levels in GDM vs non-diabetic control women in late pregnancy (>24 weeks) – 10 studies*

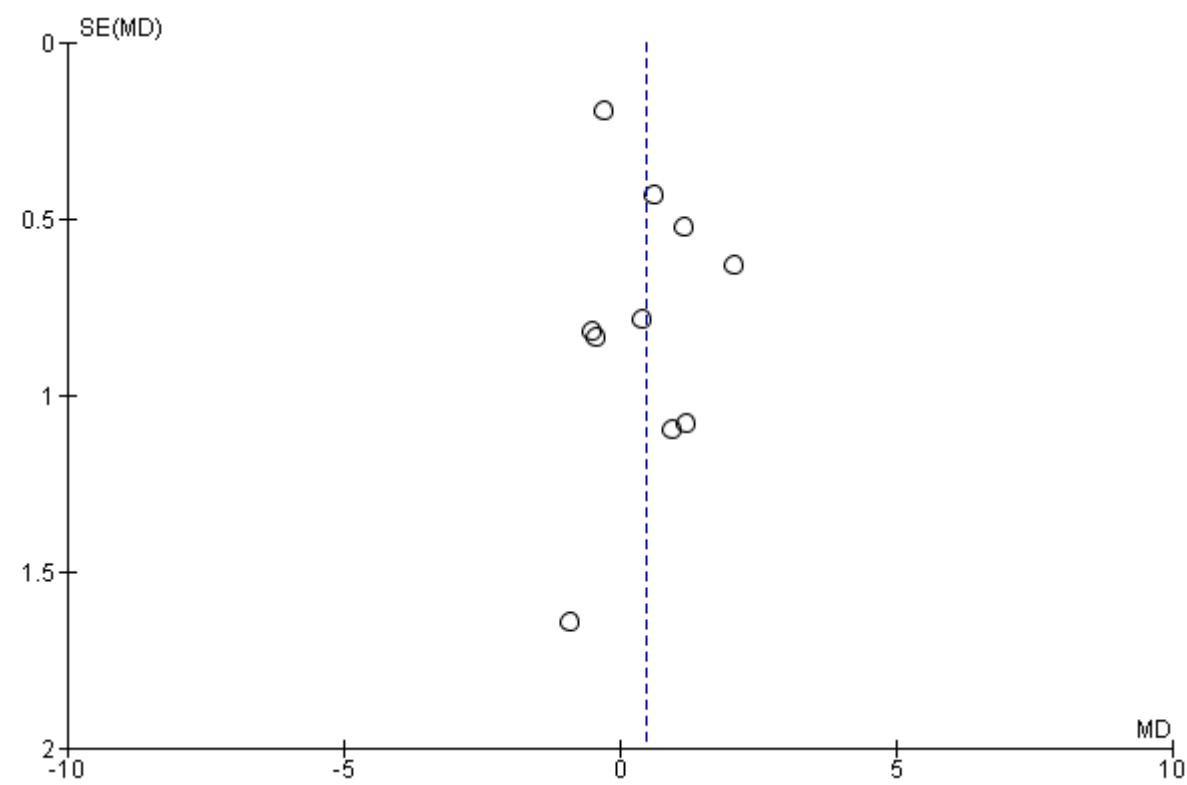

Supplement: s1 [file s1]
